# Supplementary material
Source: Elsevier journal article supplement (https://www.sciencedirect.com/science/article/pii/S0300893224001453)
Supplement: mmc1 [file mmc1.pdf]

## **SUPPLEMENTARY DATA**

### **Brief summarization of KAMIR-NIH and KAMIR-V registries protocol**

In the KAMIR-NIH and KAMIR-V registries, acute myocardial infarction (MI) was diagnosed by detection of an increased level of cardiac biomarkers, preferably cardiac troponins, with at least 1 value above the 99th percentile of the upper reference limit, accompanied by at least 1 of the following: symptoms of myocardial ischemia, electrocardiogram changes (ST elevation, left bundle branch block, ST change without ST elevation), and imaging findings suggestive of myocardial infarction (loss of viable myocardium or new regional wall motion abnormality).<sup>1</sup> There was no exclusion criterion for either the KAMIR-NIH and KAMIR-V registries other than patient refusal to enroll.

### **Definitions of study outcomes**

Procedural success was considered in patients with final residual stenosis less than 30% with Thrombolysis in Myocardial Infarction (TIMI) grade 3 flow. Death from unknown cause was assumed to be cardiac according to the definitions of the Academic Research Consortiums (ARC).<sup>2</sup> Spontaneous MI was defined as the recurrence of symptoms or the presence of electrocardiographic changes in association with a rise of cardiac biomarkers above the upper limit of normal. Procedure-related MI was not included as a clinical event in the current analysis. Clinically-driven revascularization that occurred after discharge from the index hospitalization was coded as a repeat revascularization event, according to the ARC definitions.<sup>[Error! Marcador no definido.]</sup> Clinically-driven revascularization was defined as revascularization of a lesion with  $\geq 50\%$  diameter stenosis and at least 1 of the following: *a)* recurrence of angina; *b)* positive noninvasive test; or *c)* positive invasive physiologic test; or *d)* the presence of diameter stenosis  $\geq 70\%$ , even in the absence of other criteria. Definite or probable stent thrombosis was defined according to the ARC definitions.<sup>[Error! Marcador no definido.]</sup>

**Included covariables for propensity score matching**

The matched covariables included age, sex, body mass index, left ventricular ejection fraction, systolic blood pressure, diastolic blood pressure, hypertension, diabetes mellitus, hyperlipidemia, current smoker, previous MI, previous angina pectoris, previous heart failure, previous stroke, clinical presentation, second degree or third degree atrioventricular block, left bundle branch block, hemoglobin, multivessel disease, left main disease, culprit vessel location, ACC/AHA B2C of culprit lesion, complete revascularization, transradial access, use of GP 2b3a inhibitor, pre-PCI TIMI grade < 3, use of drug-eluting stent (DES), and major bleeding.

**Table 1 of the supplementary data**

Balance measurements of baseline characteristics in original population and matched population

|                                    | Original population |                        |       | Matched population |                        |       |
|------------------------------------|---------------------|------------------------|-------|--------------------|------------------------|-------|
|                                    | Imaging-guided PCI  | Angiography-guided PCI | ASMD  | Imaging-guided PCI | Angiography-guided PCI | ASMD  |
| <b>Patient characteristics</b>     | 375 (20.5)          | 1458 (79.5)            |       | 330 (34.7)         | 621 (65.3)             |       |
| <i>Demographics</i>                |                     |                        |       |                    |                        |       |
| Age, y                             | 64.0±12.2           | 67.4±12.4              | 0.277 | 64.2±12.1          | 64.1±12.7              | 0.004 |
| Male sex                           | 296 (78.9)          | 1071 (73.5)            | 0.129 | 260 (78.8)         | 489 (78.7)             | 0.001 |
| LVEF, %                            | 49.2 ± 12.7         | 48.1 ± 12.6            | 0.081 | 49.3 ± 12.4        | 49.5 ± 12.3            | 0.018 |
| Body mass index, kg/m <sup>2</sup> | 24.0 ± 3.6          | 23.6 ± 3.3             | 0.119 | 24.0 ± 3.6         | 23.9 ± 3.3             | 0.027 |
| <i>Cardiovascular risk factors</i> |                     |                        |       |                    |                        |       |
| Hypertension                       | 199 (53.1)          | 770 (52.8)             | 0.005 | 173 (52.4)         | 310 (49.89)            | 0.050 |

Lee JM, et al. Intravascular imaging-guided percutaneous coronary intervention in patients with acute myocardial infarction and cardiogenic shock

|                                |             |              |       |             |             |       |
|--------------------------------|-------------|--------------|-------|-------------|-------------|-------|
| Diabetes mellitus              | 106 (28.3)  | 475 (32.6)   | 0.094 | 93 (28.2)   | 169 (27.2)  | 0.022 |
| Hyperlipidemia                 | 43 (11.5)   | 160 (11.0)   | 0.016 | 40 (12.1)   | 65 (10.5)   | 0.052 |
| Current smoker                 | 161 (44.5)  | 535 (38.5)   | 0.121 | 148 (44.8)  | 285 (45.9)  | 0.021 |
| Previous myocardial infarction | 40 (10.7)   | 105 (7.2)    | 0.122 | 32 (9.7)    | 53 (8.5)    | 0.040 |
| Previous angina pectoris       | 20 (5.3)    | 113 (7.8)    | 0.098 | 19 (5.8)    | 37 (6.0)    | 0.009 |
| Previous heart failure         | 9 (2.4)     | 27 (1.9)     | 0.038 | 6 (1.8)     | 11 (1.8)    | 0.004 |
| Previous stroke                | 21 (5.6)    | 127 (8.7)    | 0.120 | 17 (5.2)    | 39 (6.3)    | 0.049 |
| <i>Process-of-care index</i>   |             |              |       |             |             |       |
| Door-to-balloon time, min      | 72 [50-147] | 70 [53-119]  | 0.088 | 72 [50-157] | 69 [51-134] | 0.086 |
| Symptom to door time, min      | 90 [41-233] | 107 [47-272] | 0.071 | 95 [44-254] | 95 [41-268] | 0.068 |
| <i>Clinical presentation</i>   |             |              | 0.090 |             |             | 0.027 |
| NSTEMI                         | 88 (23.5)   | 288 (19.8)   |       | 82 (24.8)   | 147 (23.7)  |       |

*Lee JM, et al. Intravascular imaging-guided percutaneous coronary intervention in patients with acute myocardial infarction and cardiogenic shock*

|                                |             |             |       |             |             |       |
|--------------------------------|-------------|-------------|-------|-------------|-------------|-------|
| STEMI                          | 287 (76.5)  | 1170 (80.2) |       | 248 (75.2)  | 474 (76.3)  |       |
| <i>Symptoms</i>                |             |             |       |             |             |       |
| Chest pain                     |             |             | 0.035 |             |             | 0.012 |
| Typical                        | 282 (75.2)  | 1074 (73.7) |       | 248 (75.2)  | 470 (75.7)  |       |
| Atypical or painless           | 93 (24.8)   | 384 (26.3)  |       | 82 (24.8)   | 151 (24.3)  |       |
| Dyspnea                        | 122 (32.5)  | 458 (31.4)  | 0.024 | 108 (32.7)  | 190 (30.6)  | 0.046 |
| <i>Initial hemodynamics</i>    |             |             |       |             |             |       |
| Systolic blood pressure, mmHg  | 83 [70-100] | 80 [70-90]  | 0.132 | 84 [70-100] | 80 [70-100] | 0.004 |
| Diastolic blood pressure, mmHg | 51 [41-65]  | 50 [40-60]  | 0.189 | 50 [40-63]  | 51 [40-66]  | 0.005 |
| Heart rate, bpm                | 70 [48-91]  | 70 [50-90]  | 0.019 | 70 [48-92]  | 71 [52-93]  | 0.079 |
| <i>Initial 12-lead ECG</i>     |             |             |       |             |             |       |
| Sinus rhythm                   | 240 (64.2)  | 953 (65.9)  | 0.036 | 212 (64.2)  | 425 (68.4)  | 0.089 |
| 2nd or 3rd degree AV           | 28 (7.5)    | 74 (5.1)    | 0.098 | 26 (7.9)    | 45 (7.2)    | 0.024 |

*Lee JM, et al. Intravascular imaging-guided percutaneous coronary intervention in patients with acute myocardial infarction and cardiogenic shock*

|                               |                   |                 |       |                 |                 |       |
|-------------------------------|-------------------|-----------------|-------|-----------------|-----------------|-------|
| block                         |                   |                 |       |                 |                 |       |
| Atrial fibrillation           | 47 (12.6)         | 172 (11.9)      | 0.020 | 42 (12.7)       | 66 (10.6)       | 0.065 |
| Wide QRS tachycardia          | 7 (1.9)           | 38 (2.6)        | 0.051 | 7 (2.1)         | 12 (1.9)        | 0.013 |
| Paced rhythm                  | 1 (0.3)           | 9 (0.6)         | 0.053 | 1 (0.3)         | 6 (1.0)         | 0.084 |
| Left bundle branch<br>block   | 8 (2.1)           | 33 (2.3)        | 0.010 | 8 (2.4)         | 9 (1.4)         | 0.071 |
| Right bundle branch<br>block  | 21 (5.6)          | 115 (8.0)       | 0.093 | 18 (5.5)        | 53 (8.5)        | 0.121 |
| <i>Initial bloodwork</i>      |                   |                 |       |                 |                 |       |
| Hemoglobin, g/L               | 13.3 ± 2.1        | 13.0 ± 2.3      | 0.148 | 13.4 ± 2.1      | 13.4 ± 2.3      | 0.002 |
| Platelet, 10 <sup>3</sup> /μL | 228.8 ± 76.7      | 228.5 ± 75.4    | 0.004 | 231.0 ± 77.5    | 233.7 ± 76.1    | 0.035 |
| Creatinine, mg/dL             | 1.5 ± 1.8         | 1.4 ± 1.0       | 0.076 | 1.5 ± 1.8       | 1.3 ± 0.9       | 0.143 |
| Peak CK-MB, ng/mL             | 180.5 ± 187.3     | 178.1 ± 225.2   | 0.011 | 183.8 ± 192.2   | 181.3 ± 208.4   | 0.013 |
| NT-proBNP, pg/mL              | 3301.131 ± 7420.7 | 4804.9 ± 8735.6 | 0.202 | 2555.6 ± 6324.5 | 2909.4 ± 6723.8 | 0.054 |

*Lee JM, et al. Intravascular imaging-guided percutaneous coronary intervention in patients with acute myocardial infarction and cardiogenic shock*

|                                                                       |             |             |       |             |            |       |
|-----------------------------------------------------------------------|-------------|-------------|-------|-------------|------------|-------|
| <i>Discharge medication</i>                                           |             |             |       |             |            |       |
| Aspirin                                                               | 374 (99.7)  | 1410 (96.7) | 0.230 | 329 (99.7)  | 597 (96.1) | 0.251 |
| P2Y <sub>12</sub> Inhibitor                                           | 375 (100.0) | 1411 (96.8) | 0.258 | 330 (100.0) | 600 (96.6) | 0.264 |
| Clopidogrel                                                           | 174 (46.4)  | 811 (55.6)  | 0.188 | 159 (48.2)  | 318 (51.2) | 0.033 |
| Ticagrelor                                                            | 169 (45.1)  | 482 (33.1)  | 0.248 | 145 (43.9)  | 224 (36.1) | 0.177 |
| Prasugrel                                                             | 32 (8.5)    | 118 (8.1)   | 0.016 | 26 (7.9)    | 58 (9.3)   | 0.052 |
| Beta-blocker                                                          | 249 (66.4)  | 872 (59.8)  | 0.137 | 216 (65.5)  | 391 (63.0) | 0.052 |
| RAAS blockade                                                         | 204 (54.4)  | 838 (57.5)  | 0.062 | 178 (53.9)  | 371 (59.7) | 0.117 |
| Statin                                                                | 315 (84.0)  | 1079 (74.0) | 0.247 | 275 (83.3)  | 476 (76.7) | 0.167 |
| <i>Discharge medication<br/>(excluding in-hospital<br/>mortality)</i> |             |             |       |             |            |       |
| Aspirin                                                               | 332 (100.0) | 1130 (99.7) | 0.073 | 289 (100.0) | 492 (99.6) | 0.090 |
| P2Y <sub>12</sub> Inhibitor                                           | 332 (100.0) | 1129 (99.6) | 0.084 | 289 (100.0) | 492 (99.6) | 0.090 |
| Clopidogrel                                                           | 149 (44.9)  | 620 (54.7)  |       | 135 (48.2)  | 245 (49.6) |       |



*Lee JM, et al. Intravascular imaging-guided percutaneous coronary intervention in patients with acute myocardial infarction and cardiogenic shock*

|               |            |             |       |            |            |       |
|---------------|------------|-------------|-------|------------|------------|-------|
| Ticagrelor    | 153 (46.1) | 400 (35.3)  |       | 130 (45.0) | 192 (38.9) |       |
| Prasugrel     | 30 (9.0)   | 109 (9.6)   |       | 24 (8.3)   | 55 (11.1)  |       |
| Beta-blocker  | 247 (74.4) | 863 (76.2)  | 0.041 | 214 (74.0) | 387 (78.3) | 0.101 |
| RAAS blockade | 203 (61.1) | 830 (73.3)  | 0.260 | 177 (61.2) | 367 (74.3) | 0.281 |
| Statin        | 313 (94.3) | 1040 (91.8) | 0.098 | 273 (94.5) | 458 (92.7) | 0.071 |

ASMD, absolute standardized mean difference; AV, atrioventricular; CK-MB, creatine kinase-myoglobin band; LVEF, left ventricular ejection fraction; NSTEMI, non-ST-segment elevation myocardial infarction; NT-proBNP, N-terminal pro-B-type natriuretic peptide; RASS, renin-angiotensin-aldosterone system; STEMI, ST-segment elevation myocardial infarction.

Data are expressed as No. (%) or mean  $\pm$  standard deviation, or median [quartile 1-quartile 3].

**Table 2 of the supplementary data**

Balance of measurements of lesion and procedural characteristics in the original and matched populations

|                               | Original population   |                            |       | Matched population    |                            |       |
|-------------------------------|-----------------------|----------------------------|-------|-----------------------|----------------------------|-------|
|                               | Imaging-guided<br>PCI | Angiography-<br>guided PCI | ASMD  | Imaging-guided<br>PCI | Angiography-<br>guided PCI | ASMD  |
| <b>Lesion characteristics</b> |                       |                            |       |                       |                            |       |
| <i>Angiographic findings</i>  |                       |                            |       |                       |                            |       |
| Extent of disease             |                       |                            | 0.144 |                       |                            | 0.028 |
| 1-vessel disease              | 132 (35.3)            | 628 (43.1)                 |       | 118 (35.8)            | 238 (38.3)                 |       |
| 2-vessel disease              | 141 (37.7)            | 489 (33.5)                 |       | 125 (37.9)            | 217 (34.9)                 |       |
| 3 vessel disease              | 101 (27.0)            | 341 (23.4)                 |       | 87 (26.4)             | 166 (26.7)                 |       |
| Multivessel disease           | 242 (64.7)            | 830 (56.9)                 | 0.160 | 212 (64.2)            | 383 (61.7)                 | 0.053 |
| Left main disease             | 56 (15.0)             | 125 (8.6)                  | 0.199 | 44 (13.3)             | 71 (11.4)                  | 0.058 |
| Culprit vessel location       |                       |                            | 0.010 |                       |                            | 0.002 |

*Lee JM, et al. Intravascular imaging-guided percutaneous coronary intervention in patients with acute myocardial infarction and cardiogenic shock*

|                                                   |                |                |       |                |                |       |
|---------------------------------------------------|----------------|----------------|-------|----------------|----------------|-------|
| LM                                                | 32 (8.5)       | 84 (5.8)       |       | 26 (7.9)       | 44 (7.1)       |       |
| LAD                                               | 135 (36.0)     | 473 (32.5)     |       | 122 (37.0)     | 221 (35.6)     |       |
| LCX                                               | 35 (9.3)       | 184 (12.6)     |       | 32 (9.7)       | 74 (11.9)      |       |
| RCA                                               | 173 (46.1)     | 716 (49.1)     |       | 150 (45.5)     | 282 (45.4)     |       |
| ACC/AHA B2/C of culprit lesion                    | 337 (90.8)     | 1245 (87.4)    | 0.111 | 302 (91.5)     | 562 (90.5)     | 0.035 |
| <b>Procedural characteristics</b>                 |                |                |       |                |                |       |
| <i>In patients with nonculprit vessel disease</i> | n = 242        | n = 830        |       | n = 212        | n = 383        |       |
| Complete revascularization                        | 117/242 (48.3) | 394/830 (47.5) | 0.018 | 104/212 (49.1) | 184/383 (48.0) | 0.020 |
| PCI                                               |                |                |       |                |                |       |
| Immediate nonculprit vessel                       | 90/242 (37.2)  | 257/830 (31.0) | 0.129 | 81/212 (38.2)  | 138/383 (36.0) | 0.045 |
| Staged PCI for nonculprit vessel                  | 30/242 (12.4)  | 142/830 (17.1) | 0.134 | 27/212 (12.7)  | 67/383 (17.5)  | 0.133 |
| Transradial access                                | 100 (26.7)     | 275 (18.9)     | 0.187 | 90 (27.3)      | 157 (25.3)     | 0.045 |
| Use of GP2b3a inhibitor                           | 107 (28.5)     | 244 (16.7)     | 0.285 | 94 (28.5)      | 156 (25.1)     | 0.076 |

Lee JM, et al. Intravascular imaging-guided percutaneous coronary intervention in patients with acute myocardial infarction and cardiogenic shock

|                                                      |            |             |       |            |            |       |
|------------------------------------------------------|------------|-------------|-------|------------|------------|-------|
| Thrombus aspiration                                  | 99 (26.4)  | 364 (25.0)  | 0.033 | 88 (26.7)  | 152 (24.5) | 0.050 |
| Pre-PCI TIMI grade < 3                               | 292 (78.3) | 1247 (86.1) | 0.204 | 260 (78.8) | 503 (81.0) | 0.055 |
| Use of DES                                           | 351 (93.9) | 1298 (89.6) | 0.155 | 314 (95.4) | 588 (95.1) | 0.014 |
| Post-PCI TIMI grade 3                                | 356 (94.9) | 1347 (92.5) | 0.102 | 311 (94.2) | 575 (92.6) | 0.066 |
| Procedural success                                   | 367 (97.9) | 1413 (97.0) | 0.056 | 322 (97.6) | 603 (97.1) | 0.029 |
| Total number of stents                               | 1.6±1.0    | 1.3±0.8     | 0.338 | 1.6±1.0    | 1.4±0.8    | 0.270 |
| <i>Device characteristics used in culprit vessel</i> |            |             |       |            |            |       |
| Number of stents                                     | 1.3±0.6    | 1.1±0.5     | 0.325 | 1.3±0.6    | 1.1±0.4    | 0.318 |
| Mean stent diameter, mm                              | 3.30±0.52  | 3.16±0.44   | 0.303 | 3.30±0.52  | 3.18±0.42  | 0.260 |
| Maximal stent diameter, mm                           | 3.36±0.53  | 3.18±0.44   | 0.365 | 3.36±0.52  | 3.21±0.43  | 0.325 |
| Total length of stents, mm                           | 34.1±18.4  | 30.0±14.0   | 0.251 | 34.2±17.8  | 29.8±14.0  | 0.273 |
| <i>Complications during hospitalization</i>          |            |             |       |            |            |       |
| Cardiopulmonary resuscitation                        | 113 (30.1) | 516 (35.4)  | 0.112 | 99 (30.0)  | 211 (34.0) | 0.085 |

*Lee JM, et al. Intravascular imaging-guided percutaneous coronary intervention in patients with acute myocardial infarction and cardiogenic shock*

|                        |           |            |       |           |            |       |
|------------------------|-----------|------------|-------|-----------|------------|-------|
| Defibrillation         | 72 (19.2) | 298 (20.4) | 0.031 | 64 (19.4) | 121 (19.5) | 0.002 |
| Use of IABP            | 43 (11.5) | 206 (14.1) | 0.080 | 37 (11.2) | 90 (14.5)  | 0.098 |
| Use of PCPS            | 24 (6.4)  | 130 (8.9)  | 0.095 | 20 (6.1)  | 47 (7.6)   | 0.060 |
| TPM                    | 54 (14.4) | 261 (17.9) | 0.095 | 47 (14.2) | 99 (15.9)  | 0.047 |
| PPM                    | 3 (0.8)   | 3 (0.2)    | 0.084 | 3 (0.9)   | 0 (0.0)    | 0.135 |
| Major bleeding         | 8 (2.1)   | 76 (5.2)   | 0.164 | 6 (1.8)   | 11 (1.8)   | 0.004 |
| Minor bleeding         | 20 (5.3)  | 67 (4.6)   | 0.034 | 19 (5.8)  | 20 (3.2)   | 0.123 |
| Stroke                 | 4 (1.1)   | 16 (1.1)   | 0.003 | 4 (1.2)   | 7 (1.1)    | 0.008 |
| Multiple organ failure | 13 (3.5)  | 47 (3.2)   | 0.014 | 12 (3.6)  | 20 (3.2)   | 0.023 |
| Sepsis                 | 5 (1.3)   | 29 (2.0)   | 0.051 | 4 (1.2)   | 10 (1.6)   | 0.034 |
| Acute kidney injury    | 20 (5.3)  | 63 (4.3)   | 0.047 | 16 (4.8)  | 23 (3.7)   | 0.057 |
| CABG                   | 1 (0.3)   | 1 (0.1)    | 0.048 | 1 (0.3)   | 0 (0.0)    | 0.078 |

ACC, American College of Cardiology; AHA, American Heart Association; ASMD, absolute standardized mean difference; CABG, coronary artery bypass graft; DES, drug-eluting stent; GP, glycoprotein; IABP, intra-aortic balloon pump; LAD, left anterior descending; LCX, left circumflex; LM, left main; PCI,

*Lee JM, et al. Intravascular imaging-guided percutaneous coronary intervention in patients with acute myocardial infarction and cardiogenic shock*  
percutaneous coronary intervention; PCPS, percutaneous cardiopulmonary support; PPM, permanent pacemaker; RCA, right coronary artery; TIMI, thrombolysis in myocardial infarction; TPM, temporary pacemaker.

Data are expressed as No. (%) or mean  $\pm$  standard deviation.

**Table 3 of the supplementary data**

Sensitivity analysis of clinical outcomes according to treatment strategy

|                              | Unadjusted HR<br>(95%CI) | IPW adjusted HR<br>(95%CI) | Bayesian OR<br>(95% CrI) |
|------------------------------|--------------------------|----------------------------|--------------------------|
| Patient number               | 1833                     | 1594                       | 1833                     |
| MACE*                        | 0.61 (0.47-0.79)         | 0.61 (0.45-0.83)           | 0.66 (0.49-0.88)         |
| All-cause death              | 0.51 (0.39-0.68)         | 0.62 (0.45-0.86)           | 0.56 (0.41-0.75)         |
| Cardiac death                | 0.53 (0.40-0.72)         | 0.61 (0.43-0.85)           | 0.57 (0.41-0.79)         |
| Any myocardial infarction    | 1.24 (0.40-3.90)         | 0.77 (0.22-2.67)           | 1.31 (0.36-4.03)         |
| Any vessel revascularization | 1.11 (0.65-1.90)         | 0.67 (0.33-1.36)           | 1.25 (0.70-2.15)         |

95%CI, 95% confidence interval; CrI, credible interval; HR, hazard ratio; IPW, inverse probability weighting; MACE, major adverse cardiovascular events; OR, odds ratio.

\* MACE was defined as a composite of cardiac death, any myocardial infarction, any revascularization by percutaneous or surgical methods, or definite or probable stent thrombosis at 1 year.

**Table 4 of the supplementary data**

Clinical outcomes among participating centers according to the rates of intravascular imaging device use

|                 | Tertile distribution of participating centers according to the ratio of imaging use |                                   |                                     |          |
|-----------------|-------------------------------------------------------------------------------------|-----------------------------------|-------------------------------------|----------|
|                 | Tertile 1<br>(≤ 4%)<br>(N = 796)                                                    | Tertile 2<br>(5-25%)<br>(N = 602) | Tertile 3<br>(39-100%)<br>(N = 435) | <i>P</i> |
| MACE*           | 229 (29.5)                                                                          | 135 (23.4)                        | 103 (24.3)                          | .010     |
| All-cause death | 234 (29.8)                                                                          | 127 (21.4)                        | 92 (21.3)                           | < .001   |
| Cardiac death   | 212 (27.0)                                                                          | 104 (17.6)                        | 79 (18.3)                           | < .001   |

MACE, major adverse cardiovascular events.

\*MACE was defined as a composite of cardiac death, any myocardial infarction, any revascularization by percutaneous or surgical methods, or definite or probable stent thrombosis at 1 year.



Figure 1 of the supplementary data

Balance between imaging-guided and angio-guided PCI after IPW

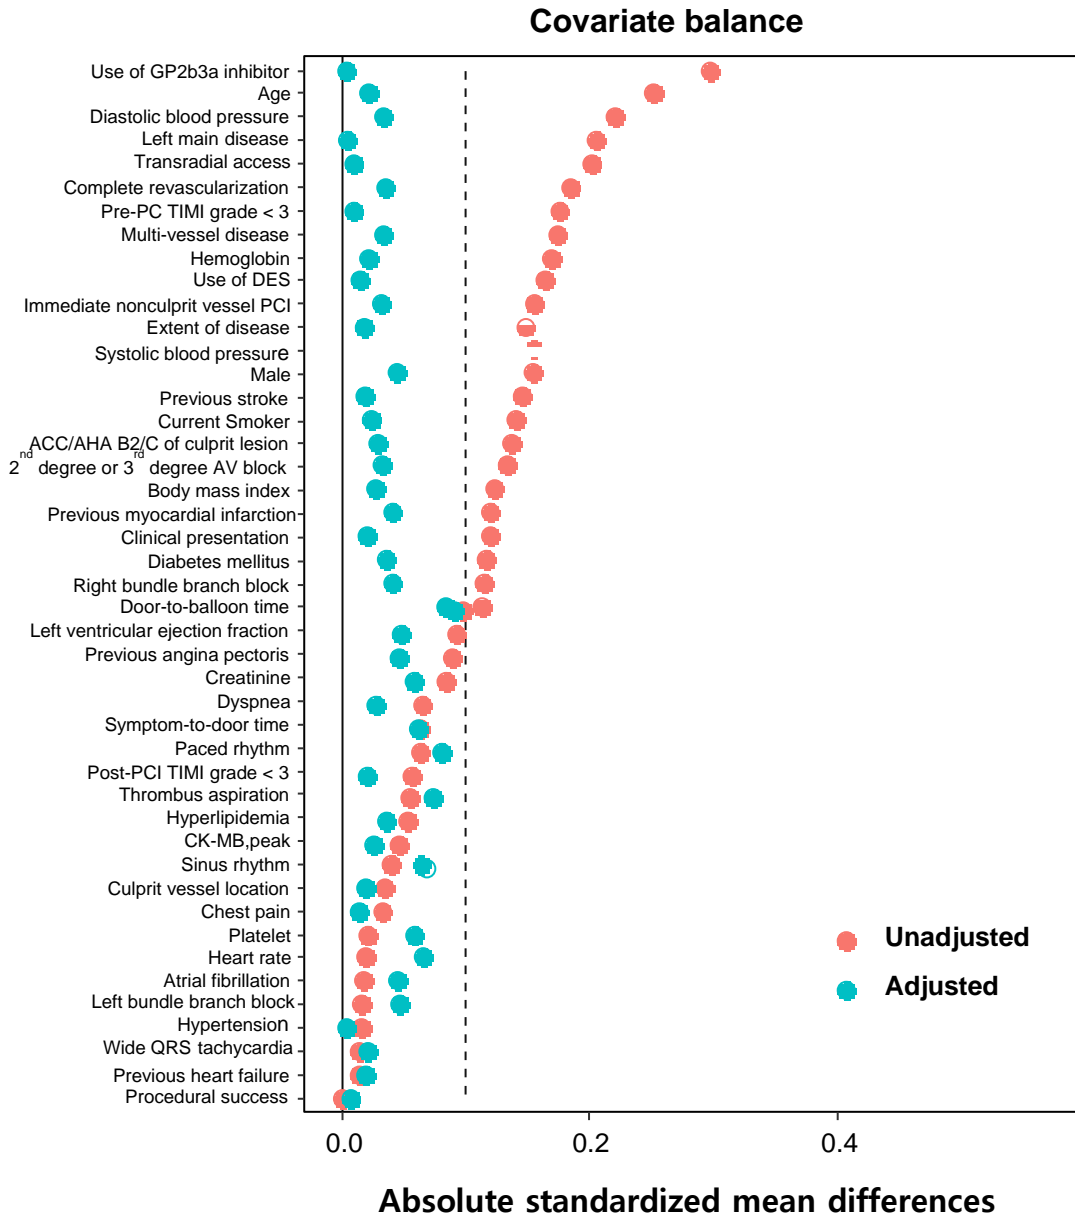

ACC, American College of Cardiology; AHA, American Heart Association; AV, atrioventricular; CK-MB, creatine kinase-myoglobin band; DES, drug-eluting stent; GP, glycoprotein; IPW, inverse probability weighting; PCI, percutaneous coronary intervention; TIMI, thrombolysis in myocardial infarction.

Absolute standard mean differences after IPW adjustment were within 10% among all adjusted

*Lee JM, et al. Intravascular imaging-guided percutaneous coronary intervention in patients with acute myocardial infarction and cardiogenic shock covariables, demonstrating successful balance between the comparison groups.*

Lee JM, et al. Intravascular imaging-guided percutaneous coronary intervention in patients with acute myocardial infarction and cardiogenic shock

Figure 2 of the supplementary data

Landmark analysis at 30 days between imaging-guided versus angio-guided PCI

**A. Original Population**

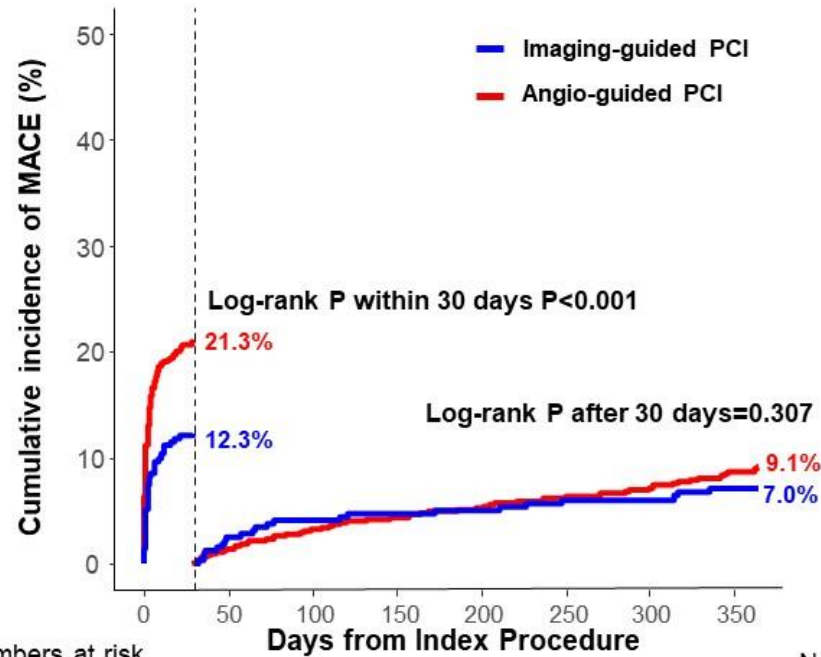

Numbers at risk

|                |      |      |      |      |     |     |     |     |
|----------------|------|------|------|------|-----|-----|-----|-----|
| Angio-guided   | 1458 | 1068 | 1042 | 1020 | 996 | 974 | 957 | 830 |
| Imaging-guided | 375  | 312  | 304  | 301  | 296 | 293 | 285 | 237 |

**B. Matched Population**

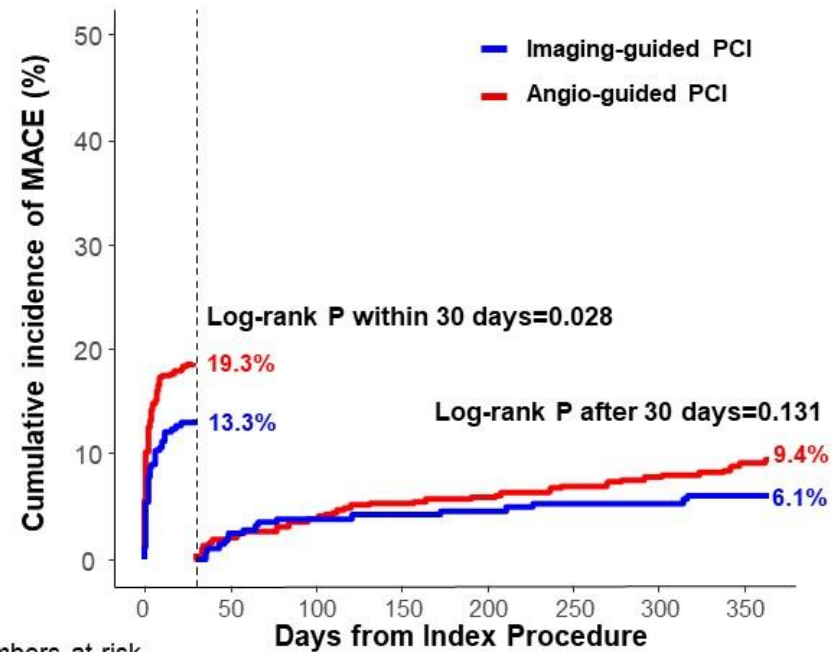

Numbers at risk

|                |     |     |     |     |     |     |     |     |
|----------------|-----|-----|-----|-----|-----|-----|-----|-----|
| Angio-guided   | 621 | 481 | 472 | 463 | 452 | 442 | 431 | 380 |
| Imaging-guided | 330 | 277 | 270 | 268 | 264 | 262 | 254 | 211 |

Lee JM, et al. Intravascular imaging-guided percutaneous coronary intervention in patients with acute myocardial infarction and cardiogenic shock  
Kaplan-Meier curve is presented for cumulative incidence of MACE at 1 year between the intravascular imaging-guided PCI group and the angiography-guided PCI group in (A) the original population and (B) the matched population. The dashed line corresponds to the 30-days time point for landmark analysis.

MACE, major adverse cardiovascular events; PCI, percutaneous coronary intervention.

#### **REFERENCES OF THE SUPPLEMENTARY DATA**

1. Thygesen K, Alpert JS, Jaffe AS, et al. Third universal definition of myocardial infarction. *Circulation*. 2012;126:2020-2035.
2. Cutlip DE, Windecker S, Mehran R, et al. Clinical end points in coronary stent trials: a case for standardized definitions. *Circulation*. 2007;11
